# Supplementary material for: Computational determination of a graphene-like TiB4 monolayer for metal-ion batteries and a nitrogen reduction electrocatalyst
Source: Royal Society of Chemistry journal article supplement (doi:10.1039/d2cp05163j), 2023-01-01
Supplement: d2cp05163j1.pdf [file d2cp05163j1.pdf]

## SUPPORTING INFORMATION

### **Computational determination of graphene-like TiB<sub>4</sub> monolayer for metal-ion batteries and nitrogen reduction electrocatalyst**

Yameng Li, Weihua Yang, Fangqi Yu, Rao Huang, Yuhua Wen\*

*Department of Physics, Xiamen University, Xiamen 361005, China, E-mail: yhw@xmu.edu.cn*

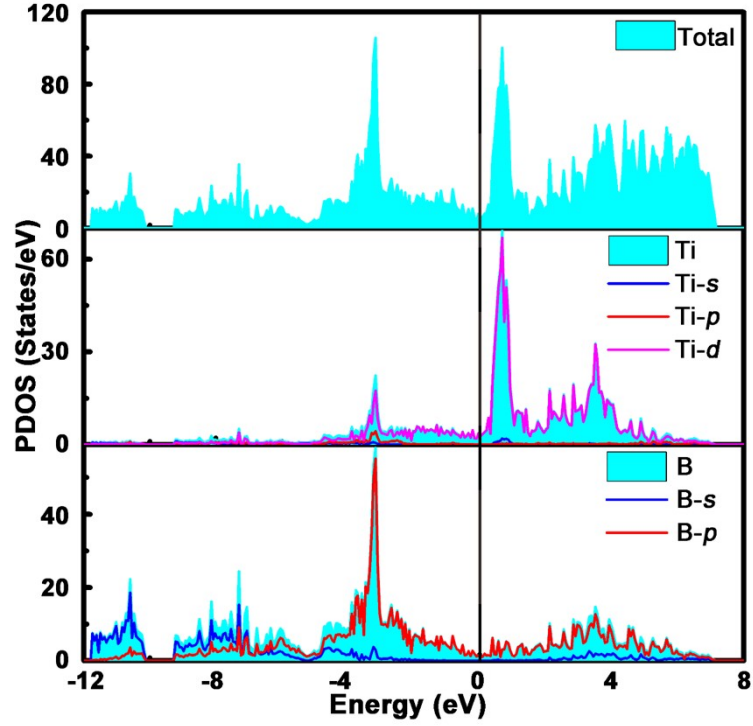

**Fig. S1.** The projected density of states (PDOS) of  $\text{TiB}_4$  monolayer.

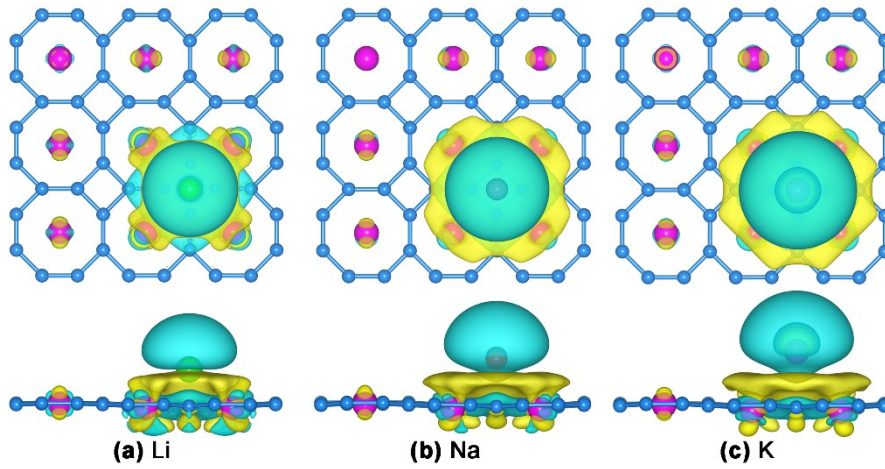

**Fig. S2.** The top and side views of charge density difference for single Li/Na/K ion on surfaces of  $\text{TiB}_4$  monolayer. The iso-surface level is set to be  $0.003 \text{ e}/\text{\AA}^3$ . The yellow and green regions denote the charge accumulation and depletion, respectively.

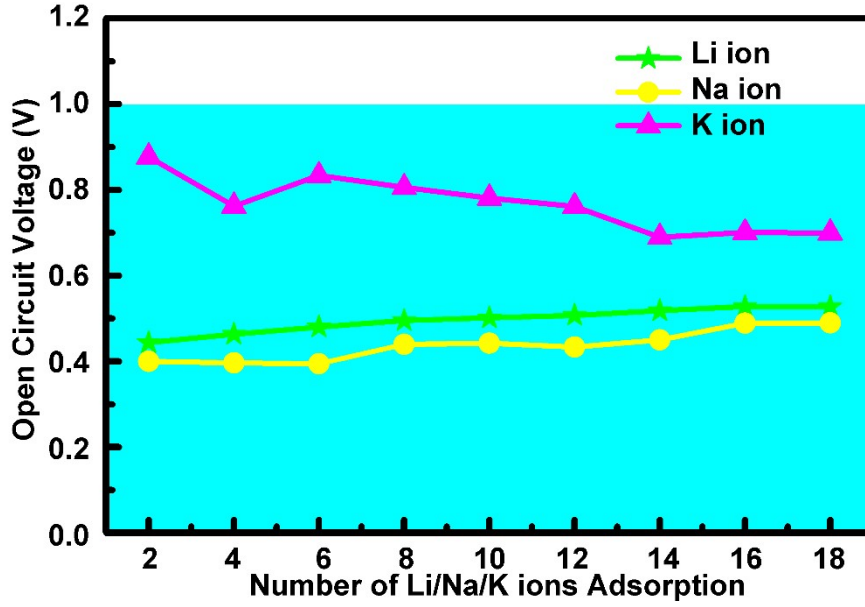

**Fig. S3.** The open circuit voltages as a function of the number of Li/Na/K ions adsorption on  $\text{TiB}_4$  monolayer.

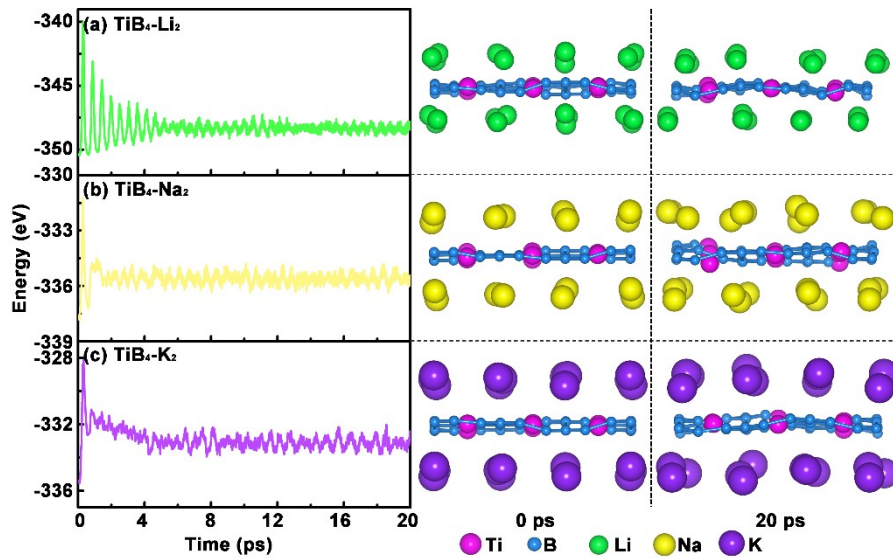

**Fig. S4.** The energy evolutions of (a) Li, (b) Na, (c) K ions absorbed on  $\text{TiB}_4$  monolayer during AIMD simulations of 20 ps at 300 K. The corresponding structures at 0 and 20 ps are shown on the right panel.

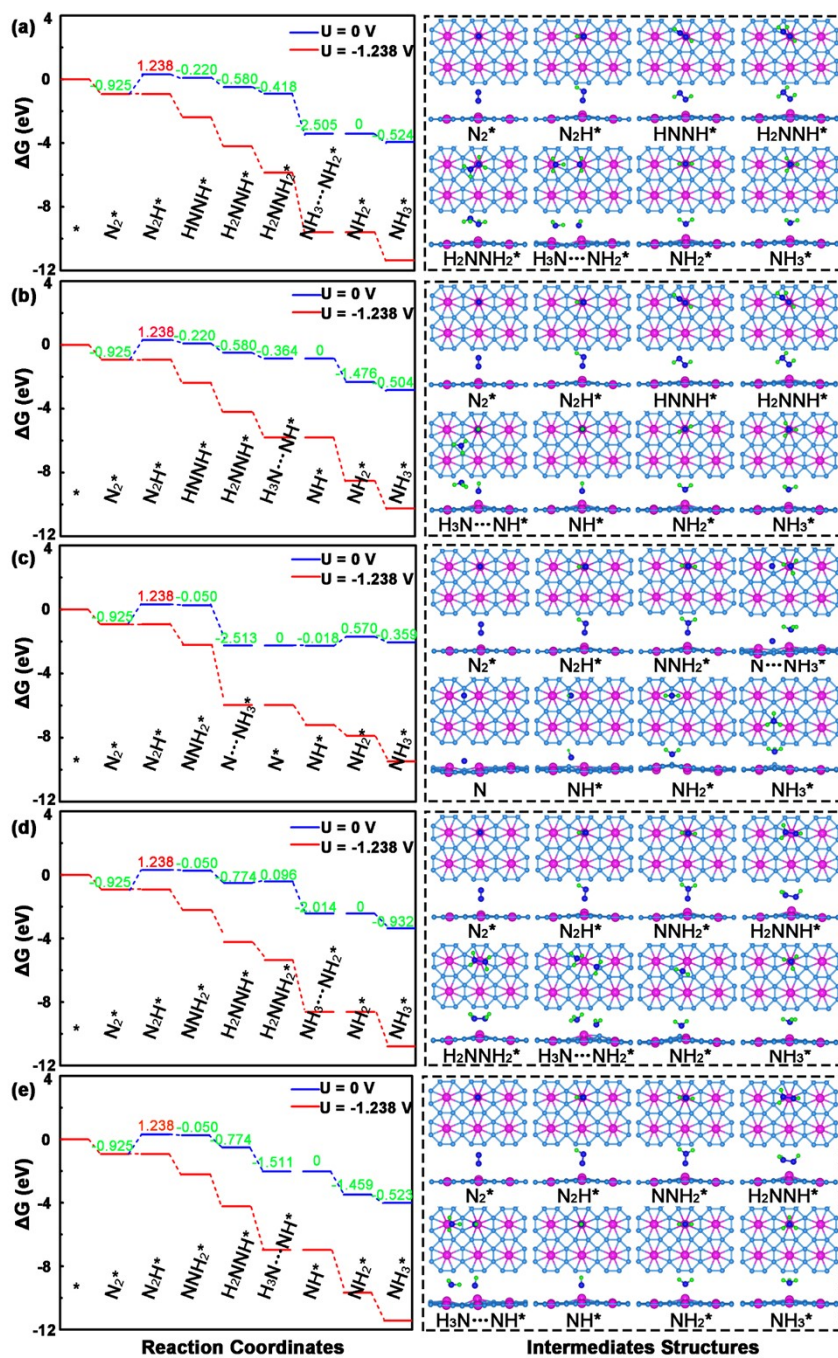

**Fig. S5.** The Gibbs free energy diagrams and corresponding structures of intermediates for  $N_2$  conversion into  $NH_3$  on  $TiB_4$  monolayer *via* five different reaction pathways with end-on configurations, respectively. The symbol\* denotes the intermediate adsorbed on the  $TiB_4$  monolayer.



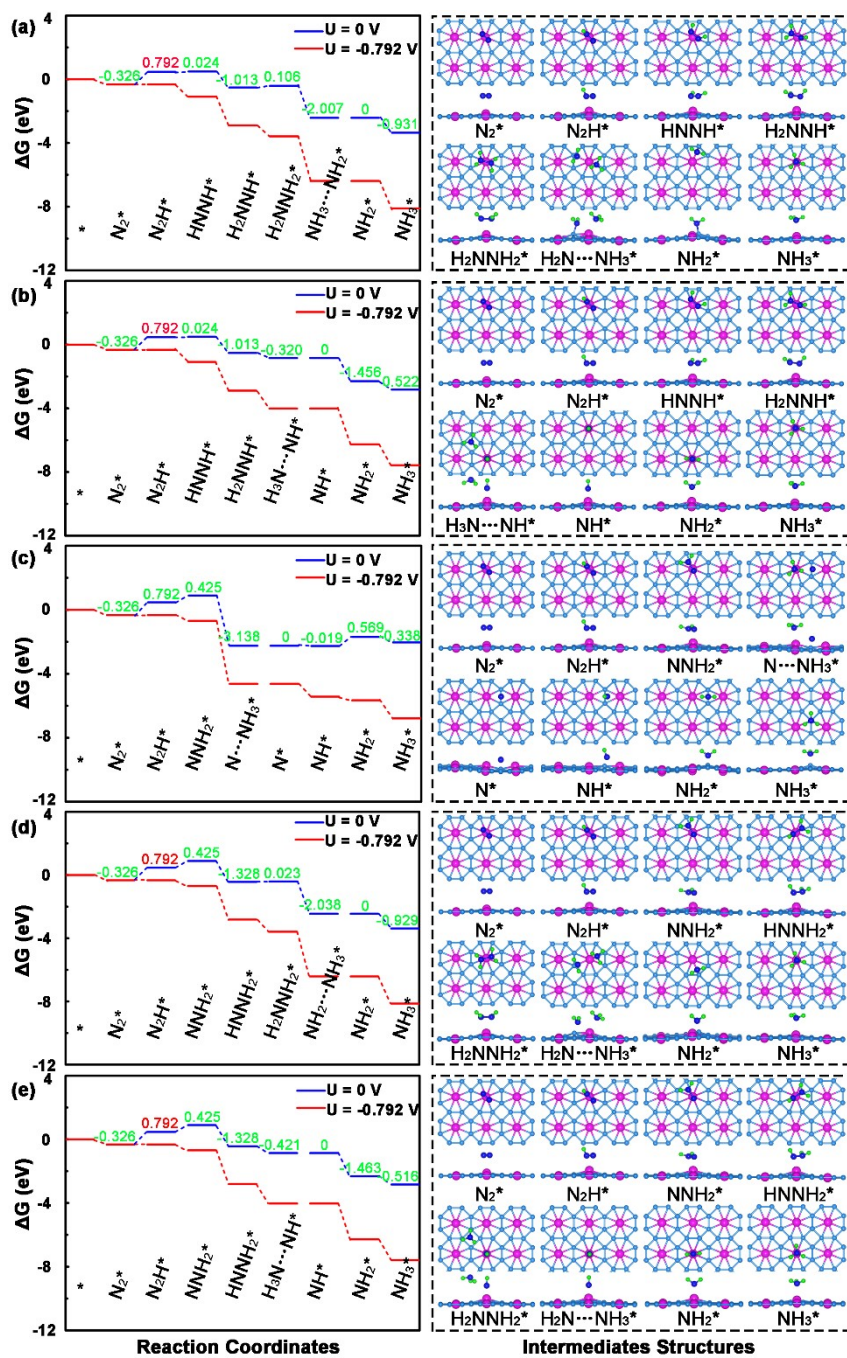

**Fig. S6.** The Gibbs free energy diagrams and corresponding structures of intermediates for  $N_2$  conversion into  $NH_3$  on  $TiB_4$  monolayer *via* five different reaction pathways with side-on configurations, respectively. The symbol\* denotes the intermediate adsorbed on the  $TiB_4$  monolayer.

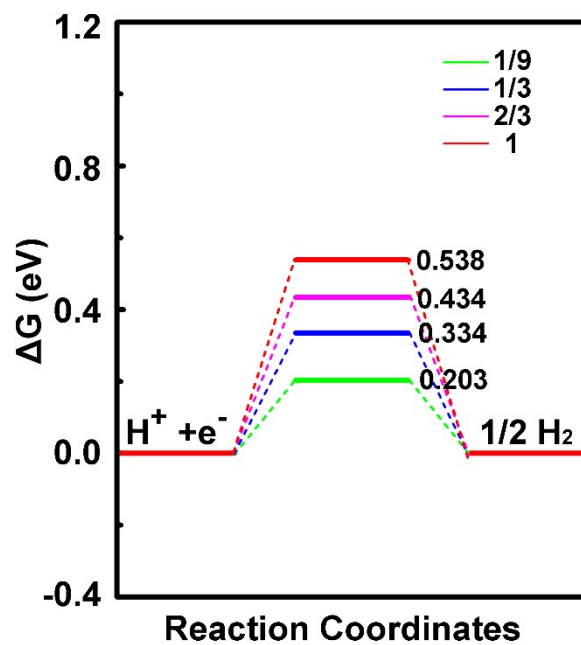

**Fig. S7.** The Gibbs free energy diagrams of different coverage hydrogen adsorption on TiB<sub>4</sub> monolayer. The green, blue, magenta, and red lines represent 1/9, 1/3, 2/3, and 1 coverage, respectively.
